# Supplementary material for: Temperature-Dependent Kinetics of the Reactions of the Criegee Intermediate CH2OO with Aliphatic Aldehydes
Source: PubMed Central journal article supplement — J Phys Chem A. 2024 Sep 5;128(37):7879–88. doi: 10.1021/acs.jpca.4c04990 (PMC11421089; doi:10.1021/acs.jpca.4c04990), 2024-09-05
Supplement: jp4c04990_si_001.pdf [file jp4c04990_si_001.pdf]

# **Supporting Information: Temperature-Dependent Kinetics of the Reactions of the Criegee Intermediate CH<sub>2</sub>OO with Aliphatic Aldehydes**

Jonas J. Enders,<sup>1</sup> Zachary A. Cornwell,<sup>1</sup> Aaron W. Harrison,<sup>2</sup> and Craig Murray<sup>1,1</sup>

1. *Department of Chemistry, University of California, Irvine, Irvine CA 92697, USA*

2. *Department of Chemistry, Austin College, Sherman, TX 75090, USA*

---

<sup>1</sup> Email: [craig.murray@uci.edu](mailto:craig.murray@uci.edu); Telephone: +1-949-824-4218

## Reactant Concentrations

The concentrations of the liquid aldehydes CH<sub>3</sub>CHO and C<sub>2</sub>H<sub>5</sub>CHO present in the flow reactor can be estimated based on the mole fraction of the aldehyde and the gas flow rates using the equation

$$[X]_{\text{est}} = \chi F P_{\text{tot}} \frac{N_A}{RT}$$

where  $\chi$  is the mole fraction of X in the gas flow,  $F$  is the fractional contribution of the flow of X to the total flow rate,  $P_{\text{tot}}$  is the total pressure in the flow reactor (Torr),  $N_A$  is the Avogadro constant ( $6.02 \times 10^{23} \text{ mol}^{-1}$ ),  $R$  is the gas constant ( $62.4 \times 10^3 \text{ Torr cm}^3 \text{ mol}^{-1} \text{ K}^{-1}$ ), and  $T$  is the temperature of the flow reactor (K). Absorbance measurements are done in the flow cell using an LED centered at 280 nm, covering the wavelength range 275–305 nm, to find the concentration in the flow reactor of each aldehyde experimentally. Plots of  $[X]_{\text{exp}}$  versus  $[X]_{\text{est}}$ , shown in Figure S1 and Figure S2, are used to determine temperature-independent scale factors with which to correct the estimated aldehyde concentrations.

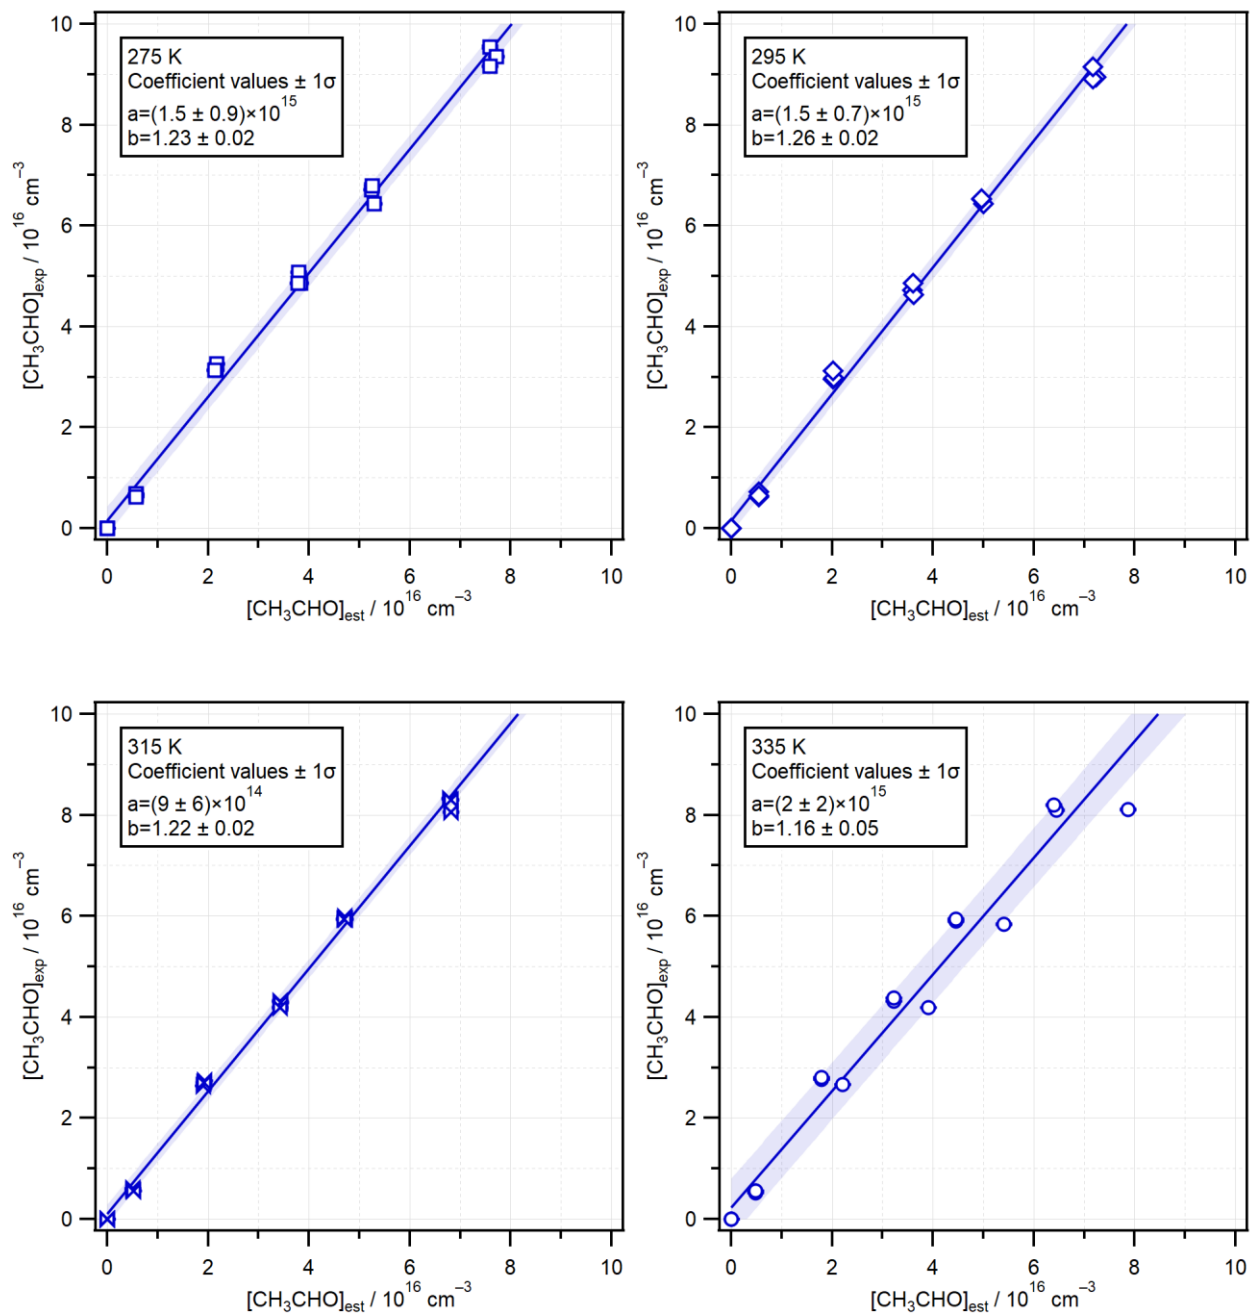

Figure S1: Experimental  $\text{CH}_3\text{CHO}$  concentrations plotted against estimated concentration values for derivation of a concentration scale factor at 4 temperatures over 275–335 K.

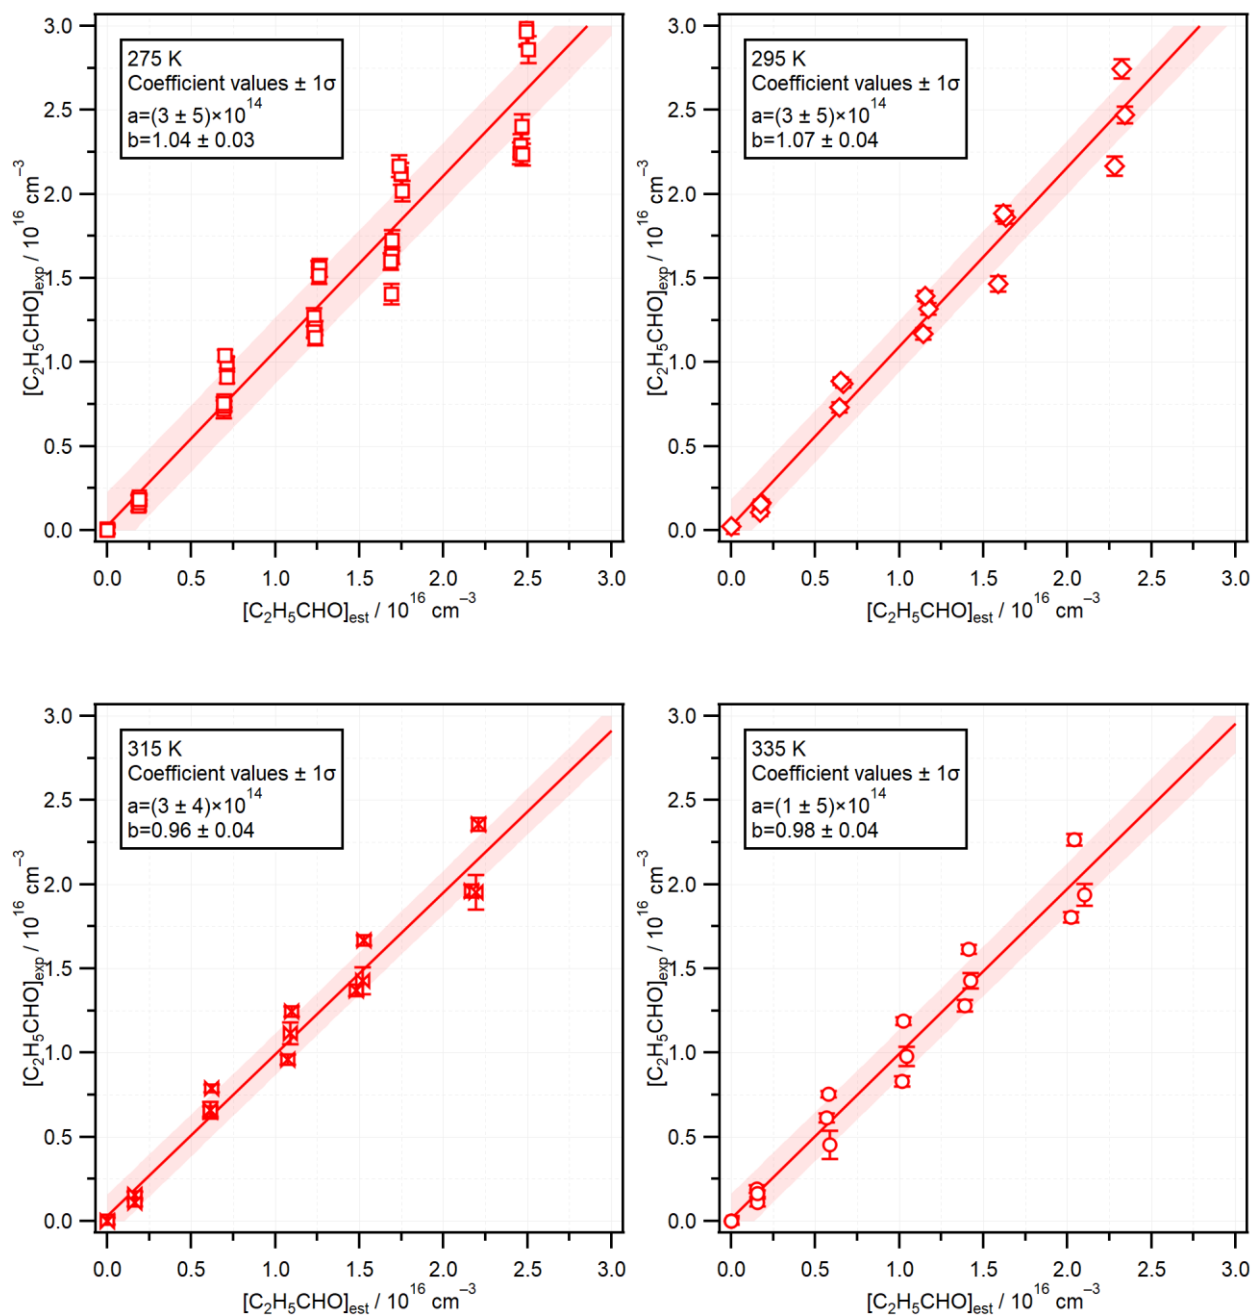

Figure S2: Experimental  $C_2H_5CHO$  concentrations plotted against estimated concentration values for derivation of a concentration scale factor at 4 temperatures over 275–335 K.

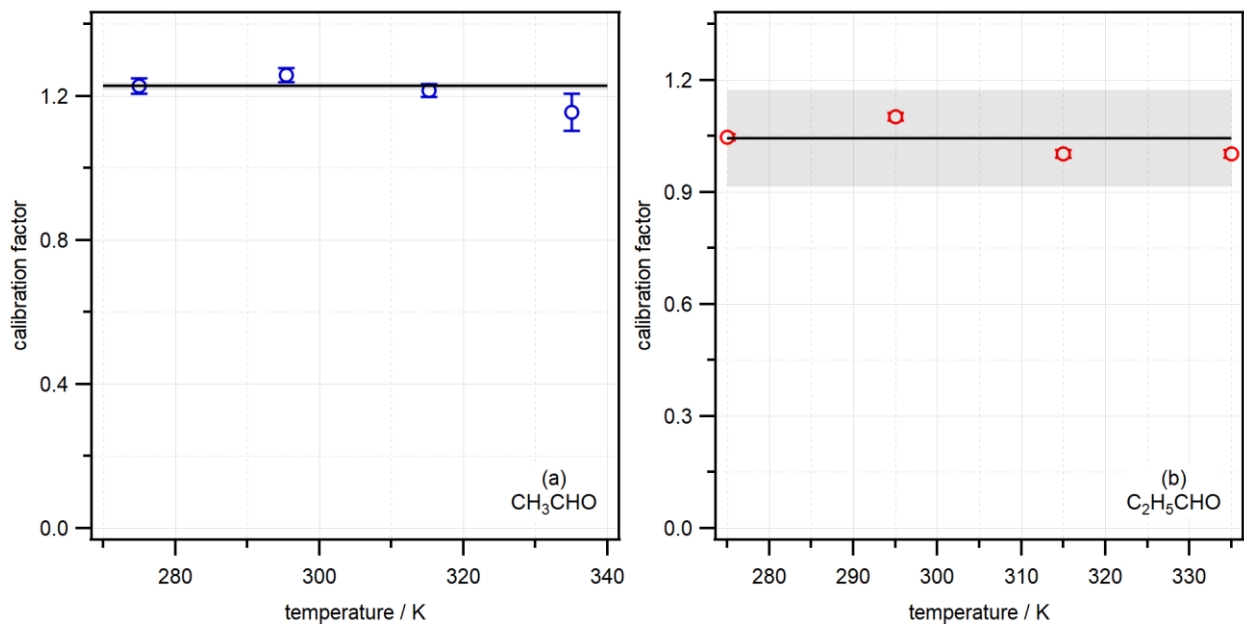

Figure S3: Scale factors determined from gradient of calibration plots shown above across temperature range 275–335 K. Solid lines represent the temperature-independent average, with shaded areas showing the estimated experimental uncertainty, based on variability in measurements.

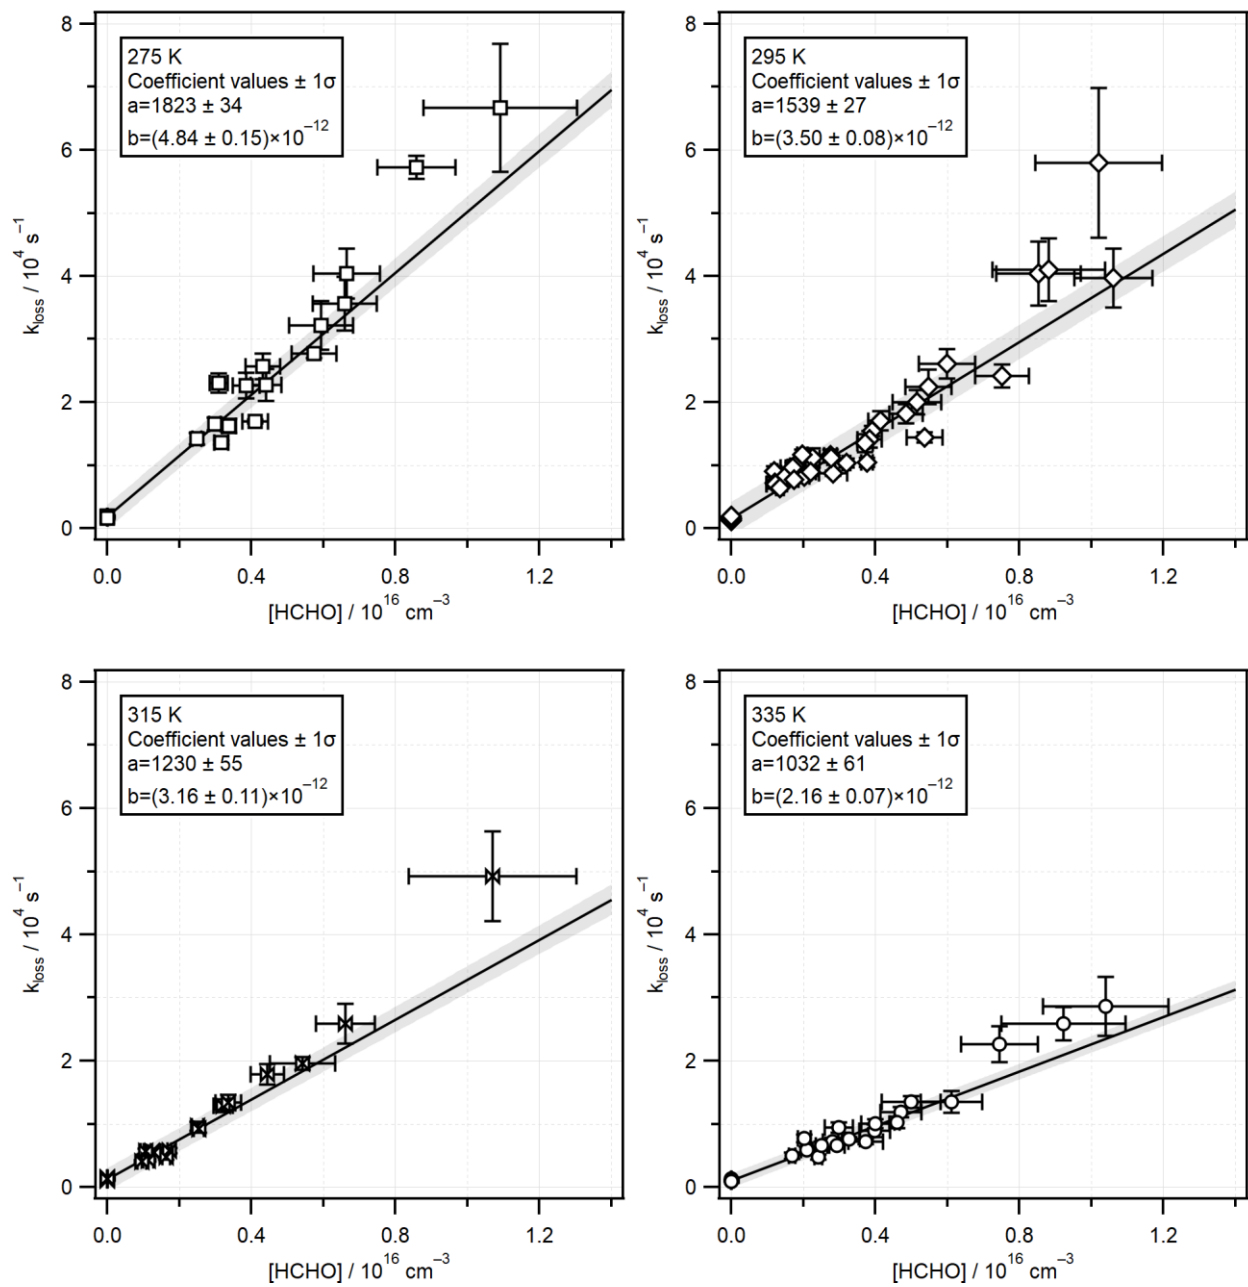

Figure S4: Compilation of pseudo-first order plots for the reaction of  $\text{CH}_2\text{OO}$  with  $\text{HCHO}$  in the temperature range 275–335 K. Shaded areas represent the statistical uncertainty in the linear fits.

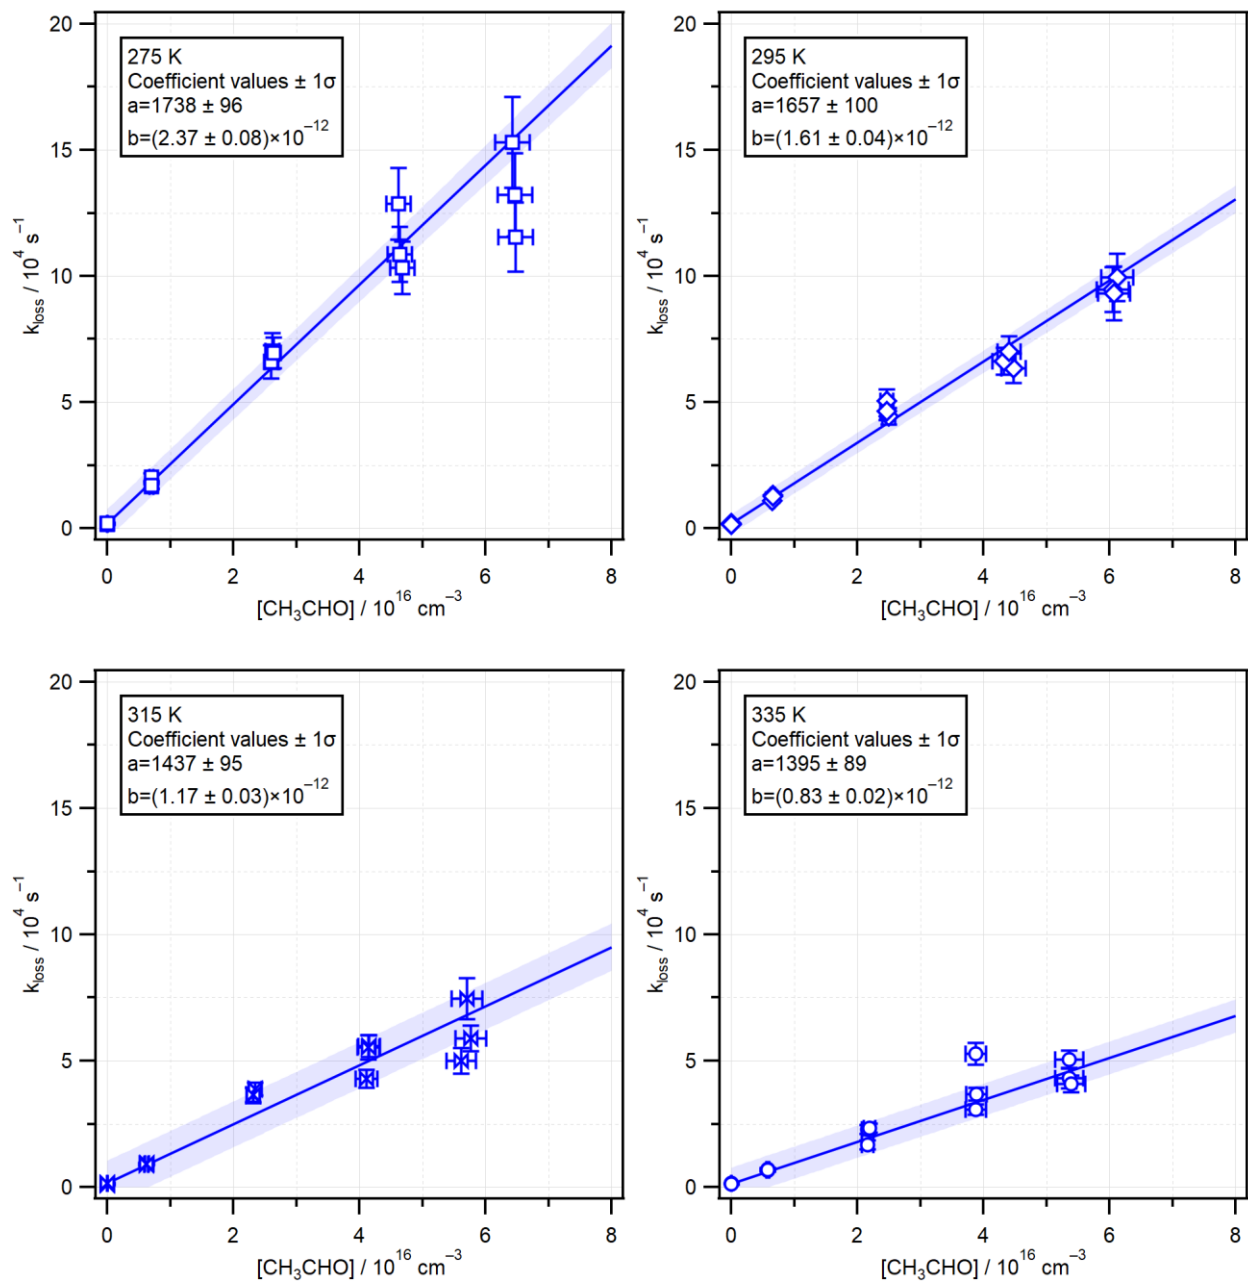

Figure S5: Compilation of pseudo-first order plots for the reaction of  $\text{CH}_2\text{OO}$  with  $\text{CH}_3\text{CHO}$  in the temperature range 275–335 K. Shaded areas represent the statistical uncertainty in the linear fits.

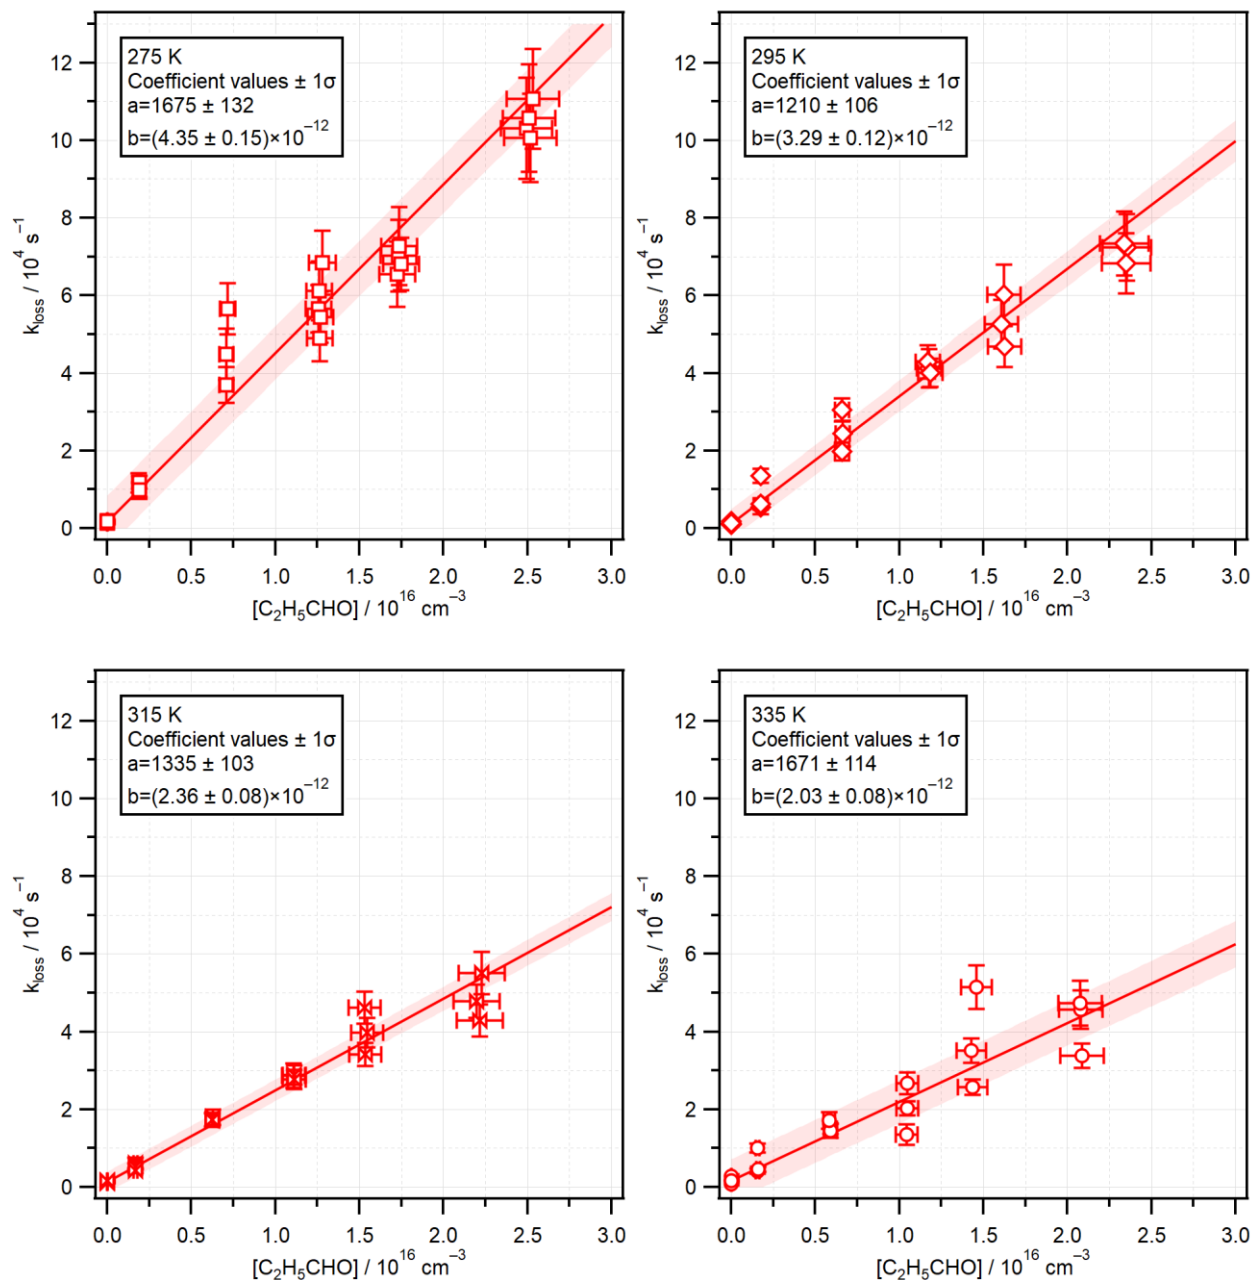

Figure S6: Compilation of pseudo-first order plots for the reaction of  $\text{CH}_2\text{OO}$  with  $\text{C}_2\text{H}_5\text{CHO}$  in the temperature range 275–335 K. Shaded areas represent the statistical uncertainty in the linear fits.



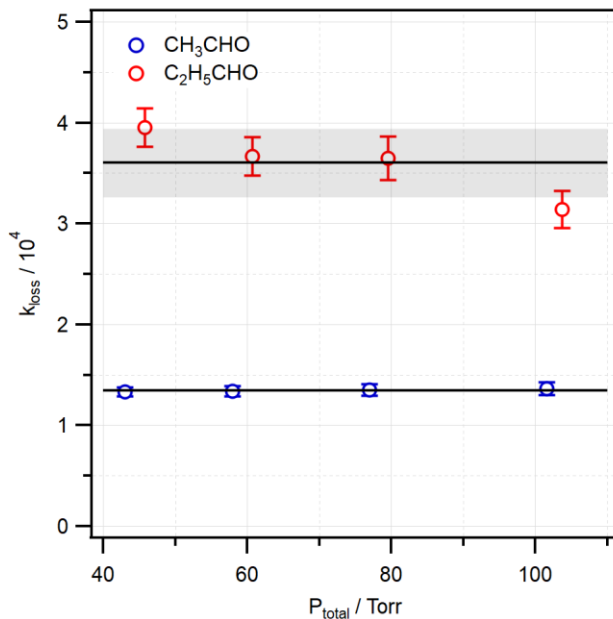

Figure S7: CH<sub>2</sub>OO loss rates in the presence of CH<sub>3</sub>CHO ([CH<sub>3</sub>CHO]=(6.8±0.4)×10<sup>15</sup> cm<sup>-3</sup>) and C<sub>2</sub>H<sub>5</sub>CHO ([C<sub>2</sub>H<sub>5</sub>CHO]=(1.1±0.1)×10<sup>16</sup> cm<sup>-3</sup>) at 295 K. Total pressure was varied by changing the flow of N<sub>2</sub> buffer gas while holding all other flows constant. The solid lines represent the average of the loss rates determined at each pressure. Shaded areas represent 1σ uncertainties.

## Cartesian Coordinates (Å) for CBS-QB3 Optimized Geometries and Relative Energies

### CH<sub>2</sub>OO + HCHO

#### HCHO

|   |          |           |           |
|---|----------|-----------|-----------|
| C | 0.000000 | 0.000000  | -0.526260 |
| O | 0.000000 | 0.000000  | 0.673989  |
| H | 0.000000 | 0.939196  | -1.117174 |
| H | 0.000000 | -0.939196 | -1.117174 |

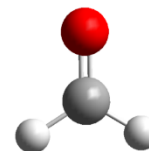

|                   |             |                      |             |
|-------------------|-------------|----------------------|-------------|
| Temperature=      | 298.150000  | Pressure=            | 1.000000    |
| E(ZPE)=           | 0.026228    | E(Thermal)=          | 0.029097    |
| E(SCF)=           | -113.909678 | DE(MP2)=             | -0.390356   |
| DE(CBS)=          | -0.039154   | DE(MP34)=            | -0.014891   |
| DE(CCSB)=         | -0.009663   | DE(Int)=             | 0.012654    |
| DE(Empirical)=    | -0.019324   |                      |             |
| CBS-QB3 (0 K)=    | -114.344185 | CBS-QB3 Energy=      | -114.341315 |
| CBS-QB3 Enthalpy= | -114.340371 | CBS-QB3 Free Energy= | -114.365186 |

#### vdW

|   |           |           |           |
|---|-----------|-----------|-----------|
| O | -1.211003 | -0.164732 | -0.380067 |
| O | -0.586441 | -1.228034 | 0.215945  |
| C | 1.545849  | -0.361267 | -0.042510 |
| O | 1.326194  | 0.840339  | -0.056626 |
| C | -1.116223 | 0.942494  | 0.206134  |
| H | -0.685138 | 0.999668  | 1.195866  |
| H | -1.551035 | 1.780510  | -0.325523 |
| H | 1.805089  | -0.898176 | 0.884886  |
| O | 1.623327  | -0.949946 | -0.970993 |

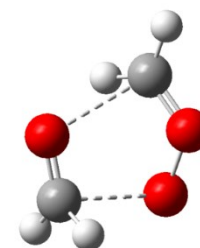

|                   |             |                      |             |
|-------------------|-------------|----------------------|-------------|
| Temperature=      | 298.150000  | Pressure=            | 1.000000    |
| E(ZPE)=           | 0.060614    | E(Thermal)=          | 0.066979    |
| E(SCF)=           | -302.544268 | DE(MP2)=             | -1.028347   |
| DE(CBS)=          | -0.102473   | DE(MP34)=            | -0.033623   |
| DE(CCSB)=         | -0.034046   | DE(Int)=             | 0.032116    |
| DE(Empirical)=    | -0.048529   |                      |             |
| CBS-QB3 (0 K)=    | -303.698556 | CBS-QB3 Energy=      | -303.692190 |
| CBS-QB3 Enthalpy= | -303.691246 | CBS-QB3 Free Energy= | -303.728406 |

#### TS

|   |           |           |           |
|---|-----------|-----------|-----------|
| O | 1.647135  | 0.556673  | 0.192417  |
| O | 0.640835  | 0.519303  | 1.128595  |
| C | -0.909262 | -0.145979 | -0.295896 |
| O | -0.236590 | -0.648905 | -1.195653 |
| C | 1.907690  | -0.549742 | -0.350378 |
| H | 1.541650  | -1.469921 | 0.081253  |
| H | 2.616697  | -0.502360 | -1.168539 |
| H | -1.272372 | 0.890617  | -0.362234 |
| H | -1.338473 | -0.750975 | 0.518015  |

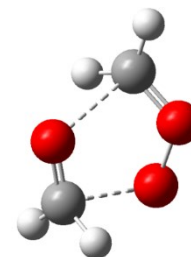

|                   |             |                      |             |
|-------------------|-------------|----------------------|-------------|
| Temperature=      | 298.150000  | Pressure=            | 1.000000    |
| E(ZPE)=           | 0.060872    | E(Thermal)=          | 0.066270    |
| E(SCF)=           | -302.540944 | DE(MP2)=             | -1.031751   |
| DE(CBS)=          | -0.102758   | DE(MP34)=            | -0.032716   |
| DE(CCSB)=         | -0.034309   | DE(Int)=             | 0.032154    |
| DE(Empirical)=    | -0.048488   |                      |             |
| CBS-QB3 (0 K)=    | -303.697939 | CBS-QB3 Energy=      | -303.692541 |
| CBS-QB3 Enthalpy= | -303.691596 | CBS-QB3 Free Energy= | -303.726584 |

## SOZ

|   |           |           |           |
|---|-----------|-----------|-----------|
| O | 1.370429  | 0.570039  | 0.515060  |
| O | 0.189596  | -0.024782 | 1.140136  |
| C | -0.610717 | -0.226328 | -0.006972 |
| O | 0.277496  | -0.669614 | -1.021217 |
| C | 1.572808  | -0.352504 | -0.535197 |
| H | 2.069922  | -1.260787 | -0.174760 |
| H | 2.161652  | 0.161825  | -1.297840 |
| H | -1.099042 | 0.704418  | -0.318820 |
| H | -1.334831 | -1.003557 | 0.247191  |

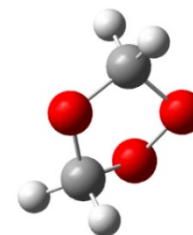

|                   |             |                      |             |
|-------------------|-------------|----------------------|-------------|
| Temperature=      | 298.150000  | Pressure=            | 1.000000    |
| E(ZPE)=           | 0.066961    | E(Thermal)=          | 0.071272    |
| E(SCF)=           | -302.626706 | DE(MP2)=             | -1.030493   |
| DE(CBS)=          | -0.103384   | DE(MP34)=            | -0.030449   |
| DE(CCSB)=         | -0.027698   | DE(Int)=             | 0.031501    |
| DE(Empirical)=    | -0.048995   |                      |             |
| CBS-QB3 (0 K)=    | -303.769263 | CBS-QB3 Energy=      | -303.764952 |
| CBS-QB3 Enthalpy= | -303.764008 | CBS-QB3 Free Energy= | -303.796451 |

## CH<sub>2</sub>OO + CH<sub>3</sub>CHO

### CH<sub>3</sub>CHO

|   |           |           |           |
|---|-----------|-----------|-----------|
| C | 0.235625  | 0.397296  | -0.000013 |
| C | -1.168728 | -0.147737 | 0.000021  |
| O | 1.233053  | -0.276639 | -0.000047 |
| H | -1.155258 | -1.237514 | -0.000373 |
| H | -1.707749 | 0.221890  | 0.879208  |
| H | 0.305332  | 1.508807  | 0.000137  |
| H | -1.708124 | 0.222574  | -0.878641 |

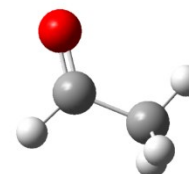

|                   |             |                      |             |
|-------------------|-------------|----------------------|-------------|
| Temperature=      | 298.150000  | Pressure=            | 1.000000    |
| E(ZPE)=           | 0.054659    | E(Thermal)=          | 0.058565    |
| E(SCF)=           | -152.971417 | DE(MP2)=             | -0.559171   |
| DE(CBS)=          | -0.055480   | DE(MP34)=            | -0.027129   |
| DE(CCSB)=         | -0.014148   | DE(Int)=             | 0.018444    |
| DE(Empirical)=    | -0.028223   |                      |             |
| CBS-QB3 (0 K)=    | -153.582464 | CBS-QB3 Energy=      | -153.578558 |
| CBS-QB3 Enthalpy= | -153.577614 | CBS-QB3 Free Energy= | -153.607406 |

### vdW (exo-)

|   |           |           |           |
|---|-----------|-----------|-----------|
| O | -1.695042 | -0.357803 | -0.299502 |
| O | -0.730572 | -1.289337 | -0.045302 |
| C | 1.209069  | 0.285444  | -0.490266 |
| O | 0.648424  | 1.317780  | -0.172789 |
| C | -1.778308 | 0.625405  | 0.475052  |
| H | -1.144798 | 0.681470  | 1.350190  |
| H | -2.523054 | 1.363147  | 0.202232  |
| C | 2.162281  | -0.466371 | 0.397887  |
| H | 1.904092  | -1.526936 | 0.409620  |
| H | 3.175676  | -0.374318 | -0.010921 |
| H | 2.142395  | -0.059055 | 1.408968  |
| H | 1.104955  | -0.116295 | -1.515384 |

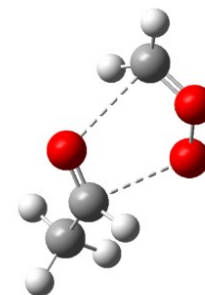

|                |             |             |           |
|----------------|-------------|-------------|-----------|
| Temperature=   | 298.150000  | Pressure=   | 1.000000  |
| E(ZPE)=        | 0.087907    | E(Thermal)= | 0.096059  |
| E(SCF)=        | -341.608124 | DE(MP2)=    | -1.194458 |
| DE(CBS)=       | -0.118487   | DE(MP34)=   | -0.046949 |
| DE(CCSB)=      | -0.038428   | DE(Int)=    | 0.037898  |
| DE(Empirical)= | -0.057450   |             |           |

|                   |             |                      |             |
|-------------------|-------------|----------------------|-------------|
| CBS-QB3 (0 K)=    | -342.938090 | CBS-QB3 Energy=      | -342.929938 |
| CBS-QB3 Enthalpy= | -342.928994 | CBS-QB3 Free Energy= | -342.970918 |

### TS (exo-)

|   |           |           |           |
|---|-----------|-----------|-----------|
| O | -1.577855 | -0.411303 | -0.243859 |
| O | -0.512206 | -1.275331 | -0.093524 |
| C | 1.013251  | 0.232188  | -0.518278 |
| O | 0.367431  | 1.269478  | -0.299960 |
| C | -1.539181 | 0.575059  | 0.543750  |
| H | -0.948546 | 0.528800  | 1.446588  |
| H | -2.277590 | 1.344552  | 0.351074  |
| C | 2.033445  | -0.314876 | 0.444379  |
| H | 2.091532  | -1.402380 | 0.380354  |
| H | 3.014596  | 0.096222  | 0.176289  |
| H | 1.801403  | -0.009658 | 1.465577  |
| H | 1.054555  | -0.174507 | -1.540246 |

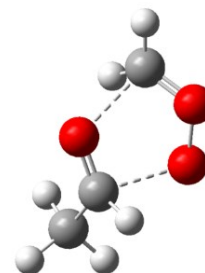

|                   |             |                      |             |
|-------------------|-------------|----------------------|-------------|
| Temperature=      | 298.150000  | Pressure=            | 1.000000    |
| E(ZPE)=           | 0.088865    | E(Thermal)=          | 0.095589    |
| E(SCF)=           | -341.598577 | DE(MP2)=             | -1.203481   |
| DE(CBS)=          | -0.119105   | DE(MP34)=            | -0.044775   |
| DE(CCSD)=         | -0.039342   | DE(Int)=             | 0.037947    |
| DE(Empirical)=    | -0.057335   |                      |             |
| CBS-QB3 (0 K)=    | -342.935803 | CBS-QB3 Energy=      | -342.929079 |
| CBS-QB3 Enthalpy= | -342.928134 | CBS-QB3 Free Energy= | -342.966530 |

### SOZ (exo-)

|   |           |           |           |
|---|-----------|-----------|-----------|
| O | -1.396687 | -0.740443 | -0.144720 |
| O | -0.024967 | -1.110722 | 0.182940  |
| C | 0.681942  | -0.033885 | -0.418078 |
| O | -0.117145 | 1.118451  | -0.145494 |
| C | 2.051871  | 0.069450  | 0.208000  |
| H | 2.632274  | -0.831359 | -0.001586 |
| H | 2.575499  | 0.928993  | -0.213871 |
| H | 1.959108  | 0.201294  | 1.286682  |
| C | -1.381830 | 0.617710  | 0.250962  |
| H | -1.499005 | 0.714096  | 1.336818  |
| H | -2.191331 | 1.112445  | -0.291062 |
| H | 0.721959  | -0.183411 | -1.504092 |

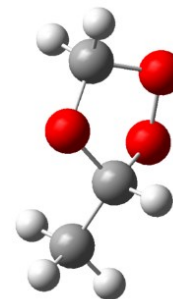

|                   |             |                      |             |
|-------------------|-------------|----------------------|-------------|
| Temperature=      | 298.150000  | Pressure=            | 1.000000    |
| E(ZPE)=           | 0.094323    | E(Thermal)=          | 0.100047    |
| E(SCF)=           | -341.683965 | DE(MP2)=             | -1.201899   |
| DE(CBS)=          | -0.119522   | DE(MP34)=            | -0.042405   |
| DE(CCSD)=         | -0.032693   | DE(Int)=             | 0.037261    |
| DE(Empirical)=    | -0.057850   |                      |             |
| CBS-QB3 (0 K)=    | -343.006750 | CBS-QB3 Energy=      | -343.001026 |
| CBS-QB3 Enthalpy= | -343.000082 | CBS-QB3 Free Energy= | -343.035917 |

vdW (endo-)

|   |           |           |           |
|---|-----------|-----------|-----------|
| O | -1.501860 | -0.494251 | -0.416534 |
| O | -0.835904 | -1.191340 | 0.549843  |
| C | 1.274122  | 0.331040  | 0.448358  |
| O | 0.698247  | 1.340511  | 0.091753  |
| C | -1.839883 | 0.686669  | -0.162600 |
| H | -1.640634 | 1.107238  | 0.814370  |
| H | -2.330814 | 1.209029  | -0.974706 |
| H | 1.296144  | 0.045241  | 1.516695  |
| C | 2.065000  | -0.559653 | -0.470545 |
| H | 3.119219  | -0.544192 | -0.170869 |
| H | 1.705080  | -1.586067 | -0.375175 |
| H | 1.971715  | -0.218937 | -1.502082 |

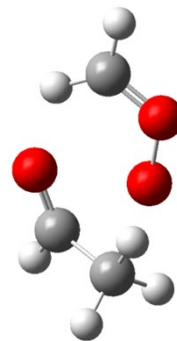

|                   |             |                      |             |
|-------------------|-------------|----------------------|-------------|
| Temperature=      | 298.150000  | Pressure=            | 1.000000    |
| E(ZPE)=           | 0.087691    | E(Thermal)=          | 0.095969    |
| E(SCF)=           | -341.608643 | DE(MP2)=             | -1.193574   |
| DE(CBS)=          | -0.118459   | DE(MP34)=            | -0.047102   |
| DE(CCSA)=         | -0.038375   | DE(Int)=             | 0.037891    |
| DE(Empirical)=    | -0.057465   |                      |             |
| CBS-QB3 (0 K)=    | -342.938037 | CBS-QB3 Energy=      | -342.929759 |
| CBS-QB3 Enthalpy= | -342.928814 | CBS-QB3 Free Energy= | -342.971182 |

TS (endo-)

|   |           |           |           |
|---|-----------|-----------|-----------|
| O | -1.370766 | -0.555364 | -0.454673 |
| O | -0.534666 | -1.248383 | 0.401232  |
| C | 1.020225  | 0.366620  | 0.443175  |
| O | 0.359493  | 1.294571  | -0.040663 |
| C | -1.726219 | 0.571490  | -0.013322 |
| H | -1.647514 | 0.791851  | 1.041619  |
| H | -2.274389 | 1.189615  | -0.714854 |
| H | 1.029165  | 0.199476  | 1.532008  |
| C | 2.075264  | -0.360778 | -0.345449 |
| H | 3.024056  | 0.178323  | -0.230694 |
| H | 2.211491  | -1.378238 | 0.020940  |
| H | 1.809078  | -0.371607 | -1.402606 |

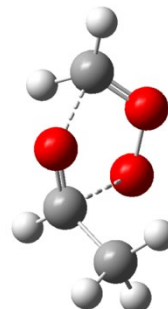

|                   |             |                      |             |
|-------------------|-------------|----------------------|-------------|
| Temperature=      | 298.150000  | Pressure=            | 1.000000    |
| E(ZPE)=           | 0.088786    | E(Thermal)=          | 0.095572    |
| E(SCF)=           | -341.599683 | DE(MP2)=             | -1.201743   |
| DE(CBS)=          | -0.119012   | DE(MP34)=            | -0.045129   |
| DE(CCSA)=         | -0.039045   | DE(Int)=             | 0.037944    |
| DE(Empirical)=    | -0.057356   |                      |             |
| CBS-QB3 (0 K)=    | -342.935238 | CBS-QB3 Energy=      | -342.928451 |
| CBS-QB3 Enthalpy= | -342.927507 | CBS-QB3 Free Energy= | -342.965989 |

### SOZ (endo-)

|   |           |           |           |
|---|-----------|-----------|-----------|
| O | 1.038821  | -0.793593 | 0.535147  |
| O | 0.074228  | -1.091514 | -0.520471 |
| C | -0.719315 | 0.099694  | -0.518924 |
| O | 0.198283  | 1.151178  | -0.211689 |
| C | 1.408676  | 0.508822  | 0.141077  |
| H | 2.093408  | 0.478584  | -0.715551 |
| H | 1.858122  | 0.993271  | 1.009823  |
| H | -1.069753 | 0.200660  | -1.550873 |
| C | -1.852674 | 0.063130  | 0.484515  |
| H | -2.363368 | 1.028539  | 0.502291  |
| H | -2.571575 | -0.712684 | 0.211030  |
| H | -1.457610 | -0.146816 | 1.479372  |

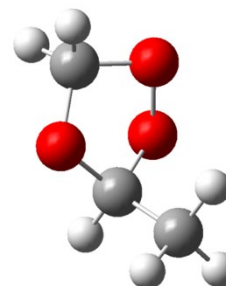

|                   |             |                      |             |
|-------------------|-------------|----------------------|-------------|
| Temperature=      | 298.150000  | Pressure=            | 1.000000    |
| E(ZPE)=           | 0.094273    | E(Thermal)=          | 0.099915    |
| E(SCF)=           | -341.682335 | DE(MP2)=             | -1.202375   |
| DE(CBS)=          | -0.119541   | DE(MP34)=            | -0.042439   |
| DE(CCSB)=         | -0.032762   | DE(Int)=             | 0.037267    |
| DE(Empirical)=    | -0.057839   |                      |             |
| CBS-QB3 (0 K)=    | -343.005751 | CBS-QB3 Energy=      | -343.000108 |
| CBS-QB3 Enthalpy= | -342.999164 | CBS-QB3 Free Energy= | -343.034789 |

### CH<sub>2</sub>OO + C<sub>2</sub>H<sub>5</sub>CHO

#### C<sub>2</sub>H<sub>5</sub>CHO

|   |           |           |           |
|---|-----------|-----------|-----------|
| C | 0.252324  | 0.415368  | -0.021788 |
| C | -1.148415 | -0.145221 | 0.053363  |
| O | 1.111907  | 0.231962  | 0.801919  |
| H | -1.316790 | -0.711215 | -0.873424 |
| H | 0.456614  | 1.037005  | -0.922997 |
| H | -1.838230 | 0.707775  | -0.012025 |
| C | -1.417651 | -0.995369 | 1.291194  |
| H | -1.264770 | -0.414710 | 2.202880  |
| H | -2.443180 | -1.371011 | 1.289193  |
| H | -0.737875 | -1.848530 | 1.332882  |

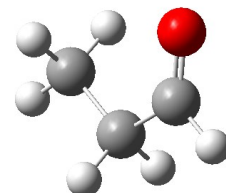

|                   |             |                      |              |
|-------------------|-------------|----------------------|--------------|
| Temperature=      | 298.150000  | Pressure=            | 1.000000     |
| E(ZPE)=           | 0.083148    | E(Thermal)=          | 0.088170     |
| E(SCF)=           | -192.018777 | DE(MP2)=             | -0.729883    |
| DE(CBS)=          | -0.071657   | DE(MP34)=            | -0.039443    |
| DE(CCSB)=         | -0.018998   | DE(Int)=             | 0.024224     |
| DE(Empirical)=    | -0.037071   |                      |              |
| CBS-QB3 (0 K)=    | -192.808458 | CBS-QB3 Energy=      | -192.803435  |
| CBS-QB3 Enthalpy= | -192.802491 | CBS-QB3 Free Energy= | -192.8357798 |

vdW (exo-)

|   |           |           |           |
|---|-----------|-----------|-----------|
| O | -2.090571 | -0.389865 | -0.129786 |
| O | -1.058064 | -1.283618 | -0.136667 |
| C | 0.671653  | 0.424253  | -0.919037 |
| O | 0.211070  | 1.377158  | -0.319038 |
| C | -2.055694 | 0.543153  | 0.707861  |
| H | -1.257219 | 0.589929  | 1.436270  |
| H | -2.872693 | 1.251207  | 0.638930  |
| C | 1.841374  | -0.403084 | -0.444930 |
| H | 1.603021  | -1.452298 | -0.643639 |
| H | 2.676494  | -0.155725 | -1.117629 |
| C | 2.225787  | -0.175105 | 1.013231  |
| H | 3.133867  | -0.726546 | 1.267482  |
| H | 2.395994  | 0.884439  | 1.213329  |
| H | 1.426026  | -0.518174 | 1.673167  |
| H | 0.296309  | 0.162466  | -1.926732 |

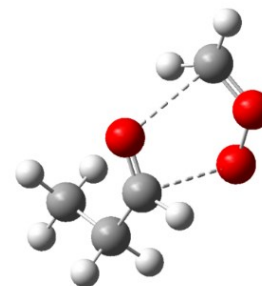

|                   |             |                      |             |
|-------------------|-------------|----------------------|-------------|
| Temperature=      | 298.150000  | Pressure=            | 1.000000    |
| E(ZPE)=           | 0.116203    | E(Thermal)=          | 0.125630    |
| E(SCF)=           | -380.655374 | DE(MP2)=             | -1.365532   |
| DE(CBS)=          | -0.134569   | DE(MP34)=            | -0.059334   |
| DE(CCSA)=         | -0.043389   | DE(Int)=             | 0.043666    |
| DE(Empirical)=    | -0.066290   |                      |             |
| CBS-QB3 (0 K)=    | -382.164618 | CBS-QB3 Energy=      | -382.155191 |
| CBS-QB3 Enthalpy= | -382.154247 | CBS-QB3 Free Energy= | -382.199700 |

TS (exo-)

|   |           |           |           |
|---|-----------|-----------|-----------|
| O | 1.939383  | 0.454051  | 0.047251  |
| O | 0.817257  | 1.262179  | 0.132690  |
| C | -0.441821 | -0.099444 | -0.957875 |
| O | 0.062106  | -1.188789 | -0.627505 |
| C | 1.780098  | -0.671956 | 0.599006  |
| H | 1.026979  | -0.806771 | 1.360760  |
| H | 2.575789  | -1.384976 | 0.414451  |
| C | -1.759806 | 0.396463  | -0.405849 |
| H | -1.745565 | 1.489904  | -0.414881 |
| H | -2.520801 | 0.096661  | -1.141403 |
| C | -2.110662 | -0.151060 | 0.974964  |
| H | -3.115429 | 0.157575  | 1.272660  |
| H | -2.068196 | -1.241854 | 0.982430  |
| H | -1.407973 | 0.224512  | 1.722146  |
| H | -0.101629 | 0.401407  | -1.877120 |

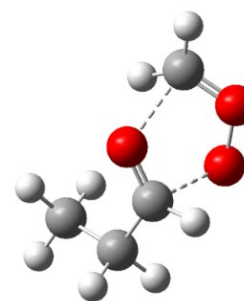

|                   |             |                      |             |
|-------------------|-------------|----------------------|-------------|
| Temperature=      | 298.150000  | Pressure=            | 1.000000    |
| E(ZPE)=           | 0.117347    | E(Thermal)=          | 0.125304    |
| E(SCF)=           | -380.644682 | DE(MP2)=             | -1.375288   |
| DE(CBS)=          | -0.135283   | DE(MP34)=            | -0.056966   |
| DE(CCSA)=         | -0.044476   | DE(Int)=             | 0.043715    |
| DE(Empirical)=    | -0.066179   |                      |             |
| CBS-QB3 (0 K)=    | -382.161813 | CBS-QB3 Energy=      | -382.153855 |
| CBS-QB3 Enthalpy= | -382.152911 | CBS-QB3 Free Energy= | -382.194731 |

SOZ (*exo-*)

|   |           |           |           |
|---|-----------|-----------|-----------|
| O | -1.990005 | -0.435359 | -0.241949 |
| O | -0.776830 | -1.159783 | 0.119491  |
| C | 0.216493  | -0.262400 | -0.357339 |
| O | -0.293702 | 1.038082  | -0.052422 |
| C | 1.523110  | -0.546126 | 0.355801  |
| H | 1.787362  | -1.591707 | 0.168195  |
| H | 1.348659  | -0.436516 | 1.429332  |
| C | -1.662403 | 0.846151  | 0.257374  |
| H | -1.813457 | 0.897350  | 1.342206  |
| H | -2.291189 | 1.563293  | -0.275502 |
| H | 0.304156  | -0.354227 | -1.447996 |
| C | 2.647059  | 0.382885  | -0.111121 |
| H | 2.384352  | 1.427290  | 0.067981  |
| H | 3.572508  | 0.165659  | 0.426444  |
| H | 2.846339  | 0.262270  | -1.179910 |

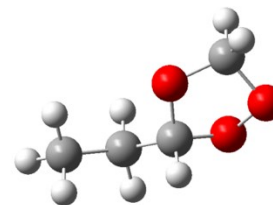

|                   |             |                      |             |
|-------------------|-------------|----------------------|-------------|
| Temperature=      | 298.150000  | Pressure=            | 1.000000    |
| E(ZPE)=           | 0.122551    | E(Thermal)=          | 0.129612    |
| E(SCF)=           | -380.730314 | DE(MP2)=             | -1.373120   |
| DE(CBS)=          | -0.135648   | DE(MP34)=            | -0.054642   |
| DE(CCSD)=         | -0.037673   | DE(Int)=             | 0.043030    |
| DE(Empirical)=    | -0.066699   |                      |             |
| CBS-QB3 (0 K)=    | -382.232515 | CBS-QB3 Energy=      | -382.225453 |
| CBS-QB3 Enthalpy= | -382.224509 | CBS-QB3 Free Energy= | -382.263877 |

vdW (*endo-*)

|   |           |           |           |
|---|-----------|-----------|-----------|
| O | -1.999373 | -0.603614 | -0.417974 |
| O | -1.260748 | -1.241521 | 0.536267  |
| C | 0.701558  | 0.502290  | 0.436458  |
| O | 0.018151  | 1.446703  | 0.092388  |
| C | -2.450173 | 0.535732  | -0.150073 |
| H | -2.282193 | 0.966320  | 0.828455  |
| H | -2.997824 | 1.013961  | -0.953022 |
| H | 0.752693  | 0.204209  | 1.502209  |
| C | 1.595604  | -0.287395 | -0.487983 |
| H | 1.223554  | -1.316487 | -0.485290 |
| H | 1.486257  | 0.116130  | -1.497422 |
| C | 3.060509  | -0.256930 | -0.024492 |
| H | 3.680470  | -0.881696 | -0.670961 |
| H | 3.465769  | 0.758165  | -0.049763 |
| H | 3.162056  | -0.635331 | 0.996887  |

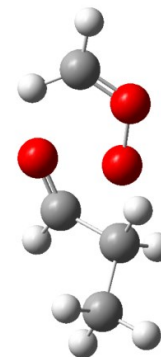

|                   |             |                      |             |
|-------------------|-------------|----------------------|-------------|
| Temperature=      | 298.150000  | Pressure=            | 1.000000    |
| E(ZPE)=           | 0.116039    | E(Thermal)=          | 0.125659    |
| E(SCF)=           | -380.654532 | DE(MP2)=             | -1.364053   |
| DE(CBS)=          | -0.134564   | DE(MP34)=            | -0.059496   |
| DE(CCSD)=         | -0.043268   | DE(Int)=             | 0.043660    |
| DE(Empirical)=    | -0.066314   |                      |             |
| CBS-QB3 (0 K)=    | -382.162529 | CBS-QB3 Energy=      | -382.152908 |
| CBS-QB3 Enthalpy= | -382.151964 | CBS-QB3 Free Energy= | -382.198606 |



TS (*endo*-)

|   |           |           |           |
|---|-----------|-----------|-----------|
| O | -1.907096 | -0.470422 | -0.497311 |
| O | -1.165637 | -1.232881 | 0.384660  |
| C | 0.513848  | 0.248466  | 0.508950  |
| O | -0.047783 | 1.238291  | 0.023231  |
| C | -2.201089 | 0.675065  | -0.060631 |
| H | -2.143079 | 0.885794  | 0.997521  |
| H | -2.671715 | 1.335630  | -0.779544 |
| H | 0.477711  | 0.067070  | 1.596432  |
| C | 1.537400  | -0.550647 | -0.260609 |
| H | 1.554731  | -1.574321 | 0.119435  |
| H | 1.229570  | -0.576698 | -1.308231 |
| C | 2.928253  | 0.095550  | -0.126013 |
| H | 3.675204  | -0.486864 | -0.670470 |
| H | 2.925245  | 1.110699  | -0.529740 |
| H | 3.245990  | 0.148196  | 0.919783  |

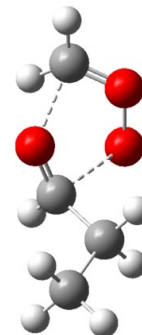

|                   |             |                      |             |
|-------------------|-------------|----------------------|-------------|
| Temperature=      | 298.150000  | Pressure=            | 1.000000    |
| E(ZPE)=           | 0.117152    | E(Thermal)=          | 0.125263    |
| E(SCF)=           | -380.645828 | DE(MP2)=             | -1.372697   |
| DE(CBS)=          | -0.135074   | DE(MP34)=            | -0.057409   |
| DE(CCSD)=         | -0.044040   | DE(Int)=             | 0.043703    |
| DE(Empirical)=    | -0.066199   |                      |             |
| CBS-QB3 (0 K)=    | -382.160391 | CBS-QB3 Energy=      | -382.152279 |
| CBS-QB3 Enthalpy= | -382.151335 | CBS-QB3 Free Energy= | -382.193574 |

SOZ (*endo*-)

|   |           |           |           |
|---|-----------|-----------|-----------|
| O | -1.634563 | -0.448109 | -0.659252 |
| O | -0.906575 | -1.134049 | 0.406448  |
| C | 0.213577  | -0.262632 | 0.589255  |
| O | -0.299575 | 1.050125  | 0.350415  |
| C | -1.613861 | 0.861435  | -0.138872 |
| H | -2.345568 | 0.972560  | 0.671043  |
| H | -1.813308 | 1.542084  | -0.968596 |
| H | 0.483021  | -0.368346 | 1.645984  |
| C | 1.373080  | -0.578679 | -0.340482 |
| H | 1.681179  | -1.610516 | -0.141676 |
| H | 0.997199  | -0.541571 | -1.366367 |
| C | 2.553265  | 0.378840  | -0.157768 |
| H | 3.364668  | 0.129618  | -0.845142 |
| H | 2.247911  | 1.409474  | -0.348508 |
| H | 2.954232  | 0.329185  | 0.859580  |

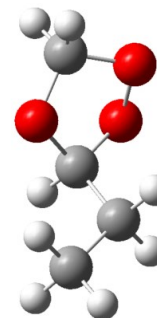

|                   |             |                      |             |
|-------------------|-------------|----------------------|-------------|
| Temperature=      | 298.150000  | Pressure=            | 1.000000    |
| E(ZPE)=           | 0.122546    | E(Thermal)=          | 0.129514    |
| E(SCF)=           | -380.728580 | DE(MP2)=             | -1.373752   |
| DE(CBS)=          | -0.135679   | DE(MP34)=            | -0.054663   |
| DE(CCSD)=         | -0.037746   | DE(Int)=             | 0.043039    |
| DE(Empirical)=    | -0.066684   |                      |             |
| CBS-QB3 (0 K)=    | -382.231519 | CBS-QB3 Energy=      | -382.224550 |
| CBS-QB3 Enthalpy= | -382.223606 | CBS-QB3 Free Energy= | -382.262683 |

### CBS-QB3 Relative Energies, Enthalpies, and Free Energies of *endo*- Pathways

Table S1 Relative energies, including zero-point contributions,  $\Delta(E+ZPE)$  at 0 K, standard enthalpies  $\Delta H^\circ$  at 298 K, and standard free energies  $\Delta G^\circ$  at 298 K calculated at the CBS-QB3 levels for the SOZ *endo*- pathway for reactions of CH<sub>2</sub>OO with, acetaldehyde and propionaldehyde. All energies are reported in kcal mol<sup>-1</sup>.

|                   | $\Delta(E+ZPE) \{ \Delta H^\circ \} [ \Delta G^\circ ] / \text{kcal mol}^{-1}$ |                                   |
|-------------------|--------------------------------------------------------------------------------|-----------------------------------|
|                   | CH <sub>3</sub> CHO                                                            | C <sub>2</sub> H <sub>5</sub> CHO |
| vdW               | -7.8 {-7.7} [+2.2]                                                             | -6.9 {-6.6} [+2.8]                |
| TS <sub>soz</sub> | -6.1 {-6.9} [+5.4]                                                             | -5.5 {-6.3} [+5.9]                |
| SOZ               | -50.3 {-51.9} [-37.8]                                                          | -50.1 {-51.6} [-37.5]             |
